# Supplementary material for: Midterm Prognosis of Patients With Pulmonary Embolism Receiving Catheter‐Directed Thrombolysis or Systemic Thrombolysis: A Nationwide Population‐Based Study
Source: PubMed Central journal article supplement — J Am Heart Assoc. 2021 Mar 31;10(7):e019296. doi: 10.1161/JAHA.120.019296 (PMC8174309; doi:10.1161/jaha.120.019296), 2021-03-31
Supplement: JAH3-10-e019296-s001.pdf [file JAH3-10-e019296-s001.pdf]

# **SUPPLEMENTAL MATERIAL**

**Table S1. ICD-9 CM diagnostic codes.**

| Variable                              | ICD-9 CM Code                                                                                                                                                                                                |
|---------------------------------------|--------------------------------------------------------------------------------------------------------------------------------------------------------------------------------------------------------------|
| Pulmonary embolism                    | 415.1x                                                                                                                                                                                                       |
| Deep vein thrombosis                  | 453.xx                                                                                                                                                                                                       |
| Hypertension                          | 401.xx-405.xx                                                                                                                                                                                                |
| Diabetes mellitus                     | 250.xx                                                                                                                                                                                                       |
| Hyperlipidemia                        | 272. xx                                                                                                                                                                                                      |
| Peripheral arterial disease           | 440.0.xx, 440.2x, 440.3x, 440.8x, 440.9x, 443.xx, 444.0x, 444.22, 444.8x, 447.8x, 447.9x                                                                                                                     |
| Chronic obstructive pulmonary disease | 491.xx, 492.xx, 496.xx                                                                                                                                                                                       |
| Gouty arthritis                       | 274.xx                                                                                                                                                                                                       |
| Liver disease                         | 070.xx, 456.0-456.2, 570.xx, 571.xx, 572.2-572.8, 573.xx, V42.7                                                                                                                                              |
| Ischemic heart disease                | 410.xx-414.xx                                                                                                                                                                                                |
| Myocardial infarction                 | 410.xx, 412.xx                                                                                                                                                                                               |
| Congestive heart failure              | 410.xx-414.xx                                                                                                                                                                                                |
| Atrial fibrillation                   | 427.3x                                                                                                                                                                                                       |
| Stroke                                | 430.xx-437.xx                                                                                                                                                                                                |
| Paralysis (Immobilization)            | 334.1, 342.xx, 343.xx, 344.xx                                                                                                                                                                                |
| Chronic kidney disease                | 580.xx-589.xx, 403.xx-404.xx 016.0x, 095.4x, 236.9x, 250.4x, 274.1x, 442.1x, 447.3x, ,440.1x, 572.4x, 642.1x, 646.2x, 753.1x, 283.11, 403.01, 404.02, 446.21                                                 |
| Pulmonary hypertension                | 416.0x, 416.8x                                                                                                                                                                                               |
| Autoimmune disease                    | 7100, 7101, 7100, 7101, 7102, 7140, 7104, 7103, 4460, 4464, 4465, 4431, 4467, 4461, 1361, 6944, 555.xx, 556, 5560, 5561, 5562, 5563, 5564, 5565, 5566, 5568, 5569, 446.2x (Catastrophic illness certificate) |
| Cancer                                | 140.xx-208.xx (Catastrophic illness certificate)                                                                                                                                                             |
| Trauma injury                         | 800.xx-959.xx                                                                                                                                                                                                |
| Heart failure                         | 428.xx                                                                                                                                                                                                       |
| Acute myocardial infarction           | 410.xx                                                                                                                                                                                                       |
| Major bleeding                        | 3361, 3636, 37272, 37632, 37742, 37923, 4230, 430, 431, 4320, 4321, 4329, 531, 5312, 5314, 5316, 532, 5322, 5324, 5326, 5307, 533, 5332, 5334, 5336, 534,                                                    |

5342, 5344, 5346, 5693, 53501, 53511, 53521, 53531,  
53541, 53551, 53561, 53571, 53783, 53784, 56202,  
56203, 56212, 56213, 56985, 578, 59381, 7191, 72992,  
7725, 8520, 8522, 8524, 8530, 86601, 86602, 86611,  
86612

|                         |                                                       |
|-------------------------|-------------------------------------------------------|
| Gastrointestinal        | 530.21, 530.7, 530.82, 531.xx-535.xx, 537.83, 537.84, |
| bleeding                | 578.xx                                                |
| Intracranial hemorrhage | 430.xx-432.xx                                         |

---

ICD-9 CM, International Classification of Diseases, Ninth Revision, Clinical  
Modification.
